# Supplementary material for: User perceptions and utilisation of features of an AI-enabled workplace digital mental wellness platform ‘mindline at work’
Source: PubMed Central journal article supplement — BMJ Health Care Inform. 2024 Aug 16;31(1):e101045. doi: 10.1136/bmjhci-2024-101045 (PMC11331828; doi:10.1136/bmjhci-2024-101045), 2024-08-16
Supplement: bmjhci-31-1-s001.pdf [file bmjhci-31-1-s001.pdf]

**Supplementary 1. Pairwise Fisher's exact test results with Bonferroni's correction**

| Variables                  | Working Experience  |                       |                       |               | P-value |
|----------------------------|---------------------|-----------------------|-----------------------|---------------|---------|
|                            | ≤5 years<br>(N=127) | 6-10 years<br>(N=122) | 11-15 years<br>(N=59) | >15<br>(N=91) |         |
| <b>Feature</b>             |                     |                       |                       |               | <0.001* |
| Multimedia resources       | 63 (49.6%)          | 89 (73.0%)            | 49 (83.1%)            | 70 (76.9%)    |         |
| Emotion self-assessment    | 33 (26.0%)          | 15 (12.3%)            | 9 (15.3%)             | 13 (14.3%)    |         |
| Chatting with Wysa chatbot | 31 (24.4%)          | 18 (14.8%)            | 1 (1.7%)              | 8 (8.8%)      |         |

| Pairs                   | P-value |
|-------------------------|---------|
| ≤5 years vs 6-10 years  | 0.004   |
| ≤5 years vs 11-15 years | 0.000   |
| ≤5 years vs >15 years   | 0.001   |
